# Supplementary material for: Over 2.5 million COI sequences in GenBank and growing
Source: PubMed Central journal article supplement (PMC6128447; doi:10.1371/journal.pone.0200177), 2018-09-07

Freshwater biomonitoring target taxa

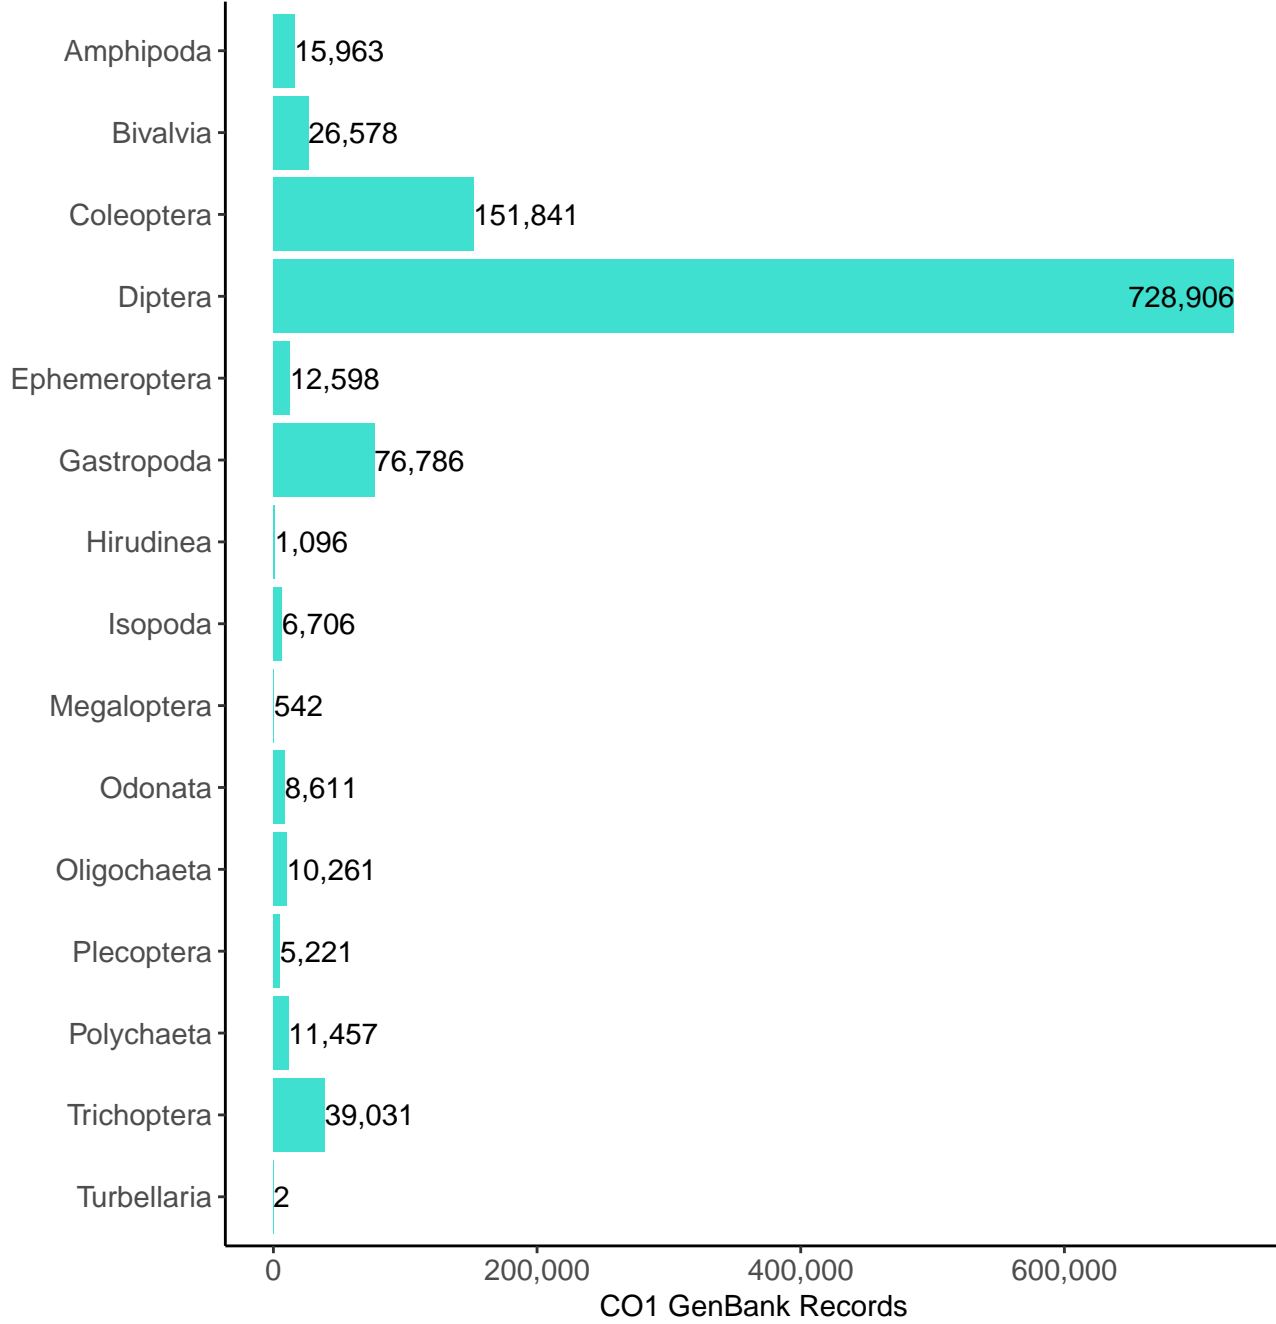

Supplement: pone.0200177.s001.pdf [file pone.0200177.s001.pdf]
